# Supplementary material
Source: HighWire-hosted journal article supplement (https://bibliotheek.ehb.be/content/suppl/2023/12/19/bmjonc-2023-000160)

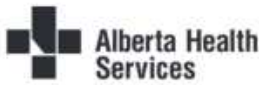

Clinician Name

Edmonton Symptom Assessment System  
Revised (ESAS-r)

Please circle the number that best describes how you feel NOW:

|                                                             |   |   |   |   |   |   |   |   |   |   |    |                                    |
|-------------------------------------------------------------|---|---|---|---|---|---|---|---|---|---|----|------------------------------------|
| No Pain                                                     | 0 | 1 | 2 | 3 | 4 | 5 | 6 | 7 | 8 | 9 | 10 | Worst Possible Pain                |
| No Tiredness<br><i>(Tiredness = lack of energy)</i>         | 0 | 1 | 2 | 3 | 4 | 5 | 6 | 7 | 8 | 9 | 10 | Worst Possible Tiredness           |
| No Drowsiness<br><i>(Drowsiness = feeling sleepy)</i>       | 0 | 1 | 2 | 3 | 4 | 5 | 6 | 7 | 8 | 9 | 10 | Worst Possible Drowsiness          |
| No Nausea                                                   | 0 | 1 | 2 | 3 | 4 | 5 | 6 | 7 | 8 | 9 | 10 | Worst Possible Nausea              |
| No Lack of Appetite                                         | 0 | 1 | 2 | 3 | 4 | 5 | 6 | 7 | 8 | 9 | 10 | Worst Possible Lack of Appetite    |
| No Shortness of Breath                                      | 0 | 1 | 2 | 3 | 4 | 5 | 6 | 7 | 8 | 9 | 10 | Worst Possible Shortness of Breath |
| No Depression<br><i>(Depression = feeling sad)</i>          | 0 | 1 | 2 | 3 | 4 | 5 | 6 | 7 | 8 | 9 | 10 | Worst Possible Depression          |
| No Anxiety<br><i>(Anxiety = feeling nervous)</i>            | 0 | 1 | 2 | 3 | 4 | 5 | 6 | 7 | 8 | 9 | 10 | Worst Possible Anxiety             |
| Best Wellbeing<br><i>(Wellbeing = how you feel overall)</i> | 0 | 1 | 2 | 3 | 4 | 5 | 6 | 7 | 8 | 9 | 10 | Worst Possible Wellbeing           |
| No _____<br>Other Problem <i>(For example constipation)</i> | 0 | 1 | 2 | 3 | 4 | 5 | 6 | 7 | 8 | 9 | 10 | Worst Possible _____               |

|                           |                                                                                                                                                                                                                                |
|---------------------------|--------------------------------------------------------------------------------------------------------------------------------------------------------------------------------------------------------------------------------|
| Participant ID            | Completed by <i>(Check one)</i><br><input type="checkbox"/> Patient<br><input type="checkbox"/> Family Caregiver<br><input type="checkbox"/> Health Care Professional Caregiver<br><input type="checkbox"/> Caregiver-assisted |
| Date <i>(yyyy-Mon-dd)</i> |                                                                                                                                                                                                                                |
| Time <i>(hh:mm)</i>       |                                                                                                                                                                                                                                |

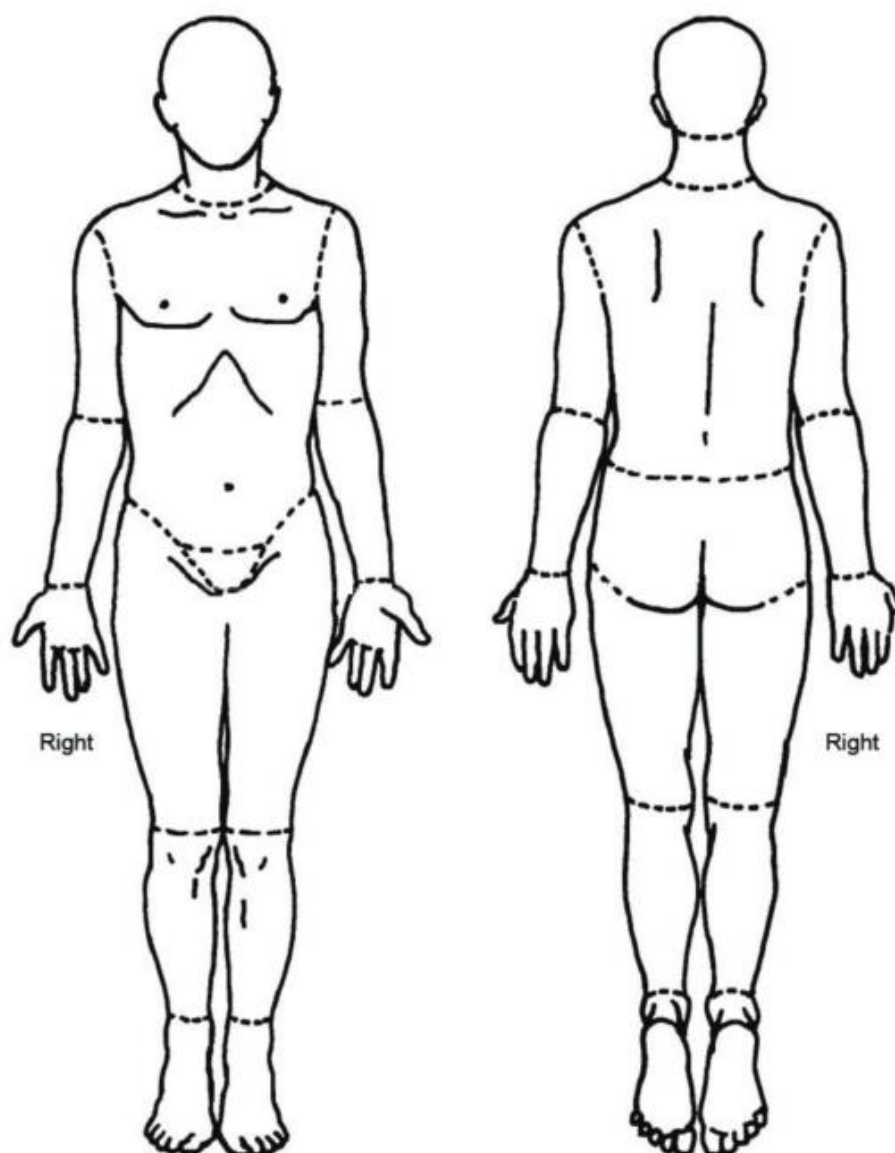

Supplement: bmjonc-2023-000160supp003_data_supplement.pdf [file bmjonc-2023-000160supp003_data_supplement.pdf]
