# Supplementary material
Source: HighWire-hosted journal article supplement (https://bibliotheek.ehb.be/content/suppl/2023/12/19/bmjonc-2023-000160)
Supplement: bmjonc-2023-000160supp004_data_supplement.pdf [file bmjonc-2023-000160supp004_data_supplement.pdf]

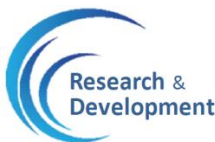

One + all | we care

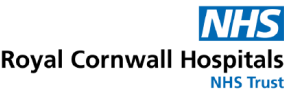

VR for symptom control and wellbeing

PARTICIPANT SUBJECTIVE QUALITATIVE QUESTIONNAIRE

|                 |  |
|-----------------|--|
| Participant ID: |  |
| Date:           |  |

Were there any negative side effects of the VR session?

|     |    |
|-----|----|
| Yes | No |
|-----|----|

If yes, please could you give the details?

|  |
|--|
|  |
|  |
|  |
|  |
|  |
|  |
|  |
|  |
|  |
|  |
