# Supplementary material
Source: HighWire-hosted journal article supplement (https://bibliotheek.ehb.be/content/suppl/2023/12/19/bmjonc-2023-000160)
Supplement: bmjonc-2023-000160supp006_data_supplement.pdf [file bmjonc-2023-000160supp006_data_supplement.pdf]

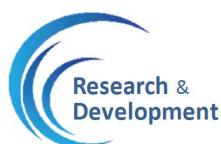

One + all | we care

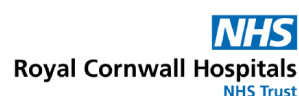

## VR for symptom control and wellbeing

### PARTICIPANT DEMOGRAPHICS

|                 |  |
|-----------------|--|
| Participant ID: |  |
| Date:           |  |

|                           |  |
|---------------------------|--|
| Participant Location      |  |
| Participant Age           |  |
| Cancer Type               |  |
| Current Line of Treatment |  |
| Current Treatment         |  |
| Treatment Intent          |  |
| Chosen VR Experience      |  |

VR for Wellbeing &amp; Symptom Control

IRAS: 296914

V1.1 Dated 16/12/2021

Participant Demographics
